# Supplementary material for: In-Silico Study of Brassinosteroid Signaling Genes in Rice Provides Insight Into Mechanisms Which Regulate Their Expression
Source: Front Genet. 2022 Jul 6;13:953458. doi: 10.3389/fgene.2022.953458 (PMC9299959; doi:10.3389/fgene.2022.953458)
Supplement: Supplementary file 6 [file Table1.XLSX]

## Sheet: Sheet1
Gene name	Locus on Chromosomes	Uniport Accession	MSU ID	RAP ID	Function	Refrence	Biblography
OsBRI1	LOC_Os01g52050	Q942F3	LOC_Os01g52050.1	Os01g0718300	Receptor kinase involved in the brassinosteroid (BR) perception	Bai et al., 2007	Bai MY, Zhang LY, Gampala SS, Zhu SW, Song WY, Chong K, Wang ZY. Functions of OsBZR1 and 14-3-3 proteins in brassinosteroid signaling in rice. Proceedings of the National Academy of Sciences. 2007 Aug 21;104(34):13839-44.
OsBAK1	LOC_Os08g07760	Q6Z4U4	LOC_Os08g07760.1	Os08g0174700	Involved in the BR signaling initiation, acts as co-receptor of BRI1	Gui et al., 2016	Gui J, Zheng S, Liu C, Shen J, Li J, Li L. OsREM4. 1 interacts with OsSERK1 to coordinate the interlinking between abscisic acid and brassinosteroid signaling in rice. Developmental cell. 2016 Jul 25;38(2):201-13.
OsGSK1	LOC_Os01g10840	Q9LWN0	LOC_Os01g10840.1	Os01g0205700	Serine-threonine kinase, negative regulator of the BR signaling	Zhang et., 2012	Zhang C, Xu Y, Guo S, Zhu J, Huan Q, Liu H, et al. (2012) Dynamics of Brassinosteroid Response Modulated by Negative Regulator LIC in Rice. PLoS Genet 8(4): e1002686. https://doi.org/10.1371/journal.pgen.1002686
OsGSK2	LOC_Os05g11730	Q60EZ2	LOC_Os05g11730.1	Os05g0207500	Serine-threonine kinase, negative regulator of the BR signaling	Tong et al., 2012	Tong H, Liu L, Jin Y, Du L, Yin Y, Qian Q, Zhu L, Chu C. DWARF AND LOW-TILLERING acts as a direct downstream target of a GSK3/SHAGGY-like kinase to mediate brassinosteroid responses in rice. The Plant Cell. 2012 Jun;24(6):2562-77.
OsBZR1	LOC_Os07g39220	Q7XI96	LOC_Os07g39220.1	Os07g0580500	Transcription factor, key regulator of the BR-dependent gene expression	Bai et al., 2007	Bai MY, Zhang LY, Gampala SS, Zhu SW, Song WY, Chong K, Wang ZY. Functions of OsBZR1 and 14-3-3 proteins in brassinosteroid signaling in rice. Proceedings of the National Academy of Sciences. 2007 Aug 21;104(34):13839-44.
OsLIC	LOC_Os06g49080	Q5Z807	LOC_Os06g49080.1	Os06g0704300	Transcription factor, negative regulator of the BR signaling	Zhang et., 2012	Zhang C, Xu Y, Guo S, Zhu J, Huan Q, Liu H, et al. (2012) Dynamics of Brassinosteroid Response Modulated by Negative Regulator LIC in Rice. PLoS Genet 8(4): e1002686. https://doi.org/10.1371/journal.pgen.1002686
OsDLT	LOC_Os06g03710	Q9LWU9	LOC_Os06g03710.1	Os06g0127800	Transcription factor, positive regulator of the BR signaling	Tong et al., 2007	Tong H, Jin Y, Liu W, Li F, Fang J, Yin Y, Qian Q, Zhu L, Chu C. DWARF AND LOW‐TILLERING, a new member of the GRAS family, plays positive roles in brassinosteroid signaling in rice. The Plant Journal. 2009 Jun;58(5):803-16.
OsELT1	LOC_Os02g58390	Q6K9S6	LOC_Os02g58390.1	Os02g0830700	Receptor-like protein, promotes the BR signaling	Yang et al., 2017	Yang, B.-J.; Lin, W.-H.; Fu, F.-F.; Xu, Z.-H.; Xue, H.-W. Receptor-like protein ELT1 promotes brassinosteroid signaling through interacting with and suppressing the endocytosis-mediated degradation of receptor BRI1. Cell Res. 2017, 27, 1182–1185
OsTUD1	LOC_Os03g13010	Q10PI9	LOC_Os03g13010.1	Os03g0232600	Positive regulator of the BR signaling	Sakamoto et al., 2013	Sakamoto T, Kitano H, Fujioka S. An E3 ubiquitin ligase, ERECT LEAF1, functions in brassinosteroid signaling of rice. Plant Signaling & Behavior. 2013 Nov 1;8(11):e27117.
OsRAVL1	LOC_Os04g49230	Q7F9W2	LOC_Os04g49230.1	Os04g0581400	Activation of the BR signaling and biosynthesis	Je et al., 2010	Je BI, Piao HL, Park SJ, Park SH, Kim CM, Xuan YH, Park SH, Huang J, Do Choi Y, An G, Wong HL. RAV-Like1 maintains brassinosteroid homeostasis via the coordinated activation of BRI1 and biosynthetic genes in rice. The Plant Cell. 2010 Jun;22(6):1777-91.
OsGW5	LOC_Os05g09520	Q75KY5	LOC_Os05g09520.1	Os05g0187500	Calmodulin-binding protein, negative regulator of the GSK proteins	Liu et al., 2017	Liu, J.; Chen, J.; Zheng, X.; Wu, F.; Lin, Q.; Heng, Y.; Tian, P.; Cheng, Z.; Yu, X.; Zhou, K.; et al. GW5 acts in the brassinosteroid signaling pathway to regulate grain width and weight in rice. Nat. Plants 2017, 3, 17043.
OsPRA2	LOC_Os06g50060	Q75KY5	LOC_Os06g50060.1	Os06g0714600	Negative regulator of the BR signaling initiation and repressor of the OsBRI1 kinase activity	Song et al., 2017	Song X, Guo H, Zhang G, Wu Y, Wang G, Chen X, Fang R. OsPRA2 fine-tunes rice brassinosteroid receptor. Plant Signaling & Behavior. 2017 Mar 4;12(3):e1257455.
OsARF11	LOC_Os04g56850	Q8S983	LOC_Os04g56850.1	Os04g0664400	Auxin-induced transcription factor, induces expression of the OsBRI1 gene	Liuet al., 2018	Liu, X.; Yang, C.Y.; Miao, R.; Zhou, C.L.; Cao, P.H.; Lan, J.; Zhu, X.J.; Mou, C.L.; Huang, Y.S.; Liu, S.J.; et al. DS1/OsEMF1 interacts with OsARF11 to control rice architecture by regulation of brassinosteroid signaling. Rice 2018, 11, 46
OsARF19	LOC_Os06g48950	Q0D9R7	LOC_Os06g48950.1	Os06g0702600	Auxin-induced transcription factor, induces expression of the OsBRI1 gene	Zhang et., 2015	Zhang S, Wang S, XuY YC, Shen C, Qian Q, Geisler M, Jiang dA, Qi Y (2015a) The auxin response factor, OsARF19, controls rice leaf angles through positively regulating OsGH3-5 and OsBRI1. Plant Cell Environ 38:638–654
OsRGA1	LOC_Os03g49990	Q7G7J6	LOC_Os03g49990.1	Os03g0707600	G-protein alpha subunit, involved in the distinct BR signaling relay, independent of the OsBRI1 receptor kinase	Oki et al., 2009	Oki, K., Inaba, N., Kitano, H., Takahashi, S., Fujisawa, Y., Kato, H., and Iwasaki, Y., 2009. Study of novel d1 alleles, defective mutants of the α subunit of heterotrimeric G-protein in rice. Genes Genet. Syst., 84: 35–42.
OsGAP1	LOC_Os02g22130	Q6YWF1	LOC_Os02g22130.1	Os02g0327000	Stimulates activity of OsPRA2 which is important for repression of the BR signaling initiation	Song et al., 2017	Song X, Guo H, Zhang G, Wu Y, Wang G, Chen X, Fang R. OsPRA2 fine-tunes rice brassinosteroid receptor. Plant Signaling & Behavior. 2017 Mar 4;12(3):e1257455.
OsBSK3	LOC_Os04g58750	B9FDE0	LOC_Os04g58750.1	Os04g0684200	Receptor-Like Cytoplasmic Kinase, positive regulator of the BR signaling, represses the cytoplasmic OsGSK proteins	Zhang et al., 2016	Zhang B, Wang X, Zhao Z, Wang R, Huang X, Zhu Y, Yuan L, Wang Y, Xu X, Burlingame AL, Gao Y. OsBRI1 activates BR signaling by preventing binding between the TPR and kinase domains of OsBSK3 via phosphorylation. Plant Physiology. 2016 Feb;170(2):1149-61.
OsRLA1/SMOS1,	LOC_Os05g32270	X5HYT8	LOC_Os05g32270.1	Os05g0389000	Transcription factor, positive regulator in the BR signaling, crosstalk point for auxin and BR signaling	Hirano et al., 2017	Hirano K, Yoshida H, Aya K, Kawamura M, Hayashi M, Hobo T, Sato-Izawa K, Kitano H, Ueguchi-Tanaka M, Matsuoka M. SMALL ORGAN SIZE 1 and SMALL ORGAN SIZE 2/DWARF AND LOW-TILLERING form a complex to integrate auxin and brassinosteroid signaling in rice. Molecular Plant. 2017 Apr 3;10(4):590-604.
OsPPKL1	LOC_Os03g44500	Q10G19	LOC_Os03g44500.1	Os03g0646900	Protein phosphatase, dephosphorylates and stabilizes the OsGSK protein, negative regulator of the BR signaling	Gao et al., 2019	Gao X, Zhang JQ, Zhang X, Zhou J, Jiang Z, Huang P, Tang Z, Bao Y, Cheng J, Tang H, Zhang W. Rice qGL3/OsPPKL1 functions with the GSK3/SHAGGY-like kinase OsGSK3 to modulate brassinosteroid signaling. The Plant Cell. 2019 May;31(5):1077-93.
OsPPKL2	LOC_Os05g05240	Q60EX6	LOC_Os05g05240.1	Os05g0144400	Homolog of the OsPPKL protein, plays a positive role in regulation of grain length	Gao et al., 2019	Gao X, Zhang JQ, Zhang X, Zhou J, Jiang Z, Huang P, Tang Z, Bao Y, Cheng J, Tang H, Zhang W. Rice qGL3/OsPPKL1 functions with the GSK3/SHAGGY-like kinase OsGSK3 to modulate brassinosteroid signaling. The Plant Cell. 2019 May;31(5):1077-93.
OsPPKL3	LOC_Os12g42310	Q2QM47	LOC_Os12g42310.1	Os12g0617900	Homolog of the OsPPKL protein, plays a negative role in regulation of grain length	Gao et al., 2019	Gao X, Zhang JQ, Zhang X, Zhou J, Jiang Z, Huang P, Tang Z, Bao Y, Cheng J, Tang H, Zhang W. Rice qGL3/OsPPKL1 functions with the GSK3/SHAGGY-like kinase OsGSK3 to modulate brassinosteroid signaling. The Plant Cell. 2019 May;31(5):1077-93.
OsPUB24	LOC_Os03g45420	Q10FT0	LOC_Os03g45420.1	Os03g0657100	U-box E3 ubiquitin ligase, negative regulator of the BR signaling, ubiquitination and proteasome-mediated degradation of OsBZR1	Min et al., 2019	Min HJ, Cui LH, Oh TR, Kim JH, Kim TW, Kim WT. Os BZR 1 turnover mediated by Os SK 22‐regulated U‐box E3 ligase Os PUB 24 in rice BR response. The Plant Journal. 2019 Aug;99(3):426-38.
OsOFP1	LOC_Os01g12690	Q5NAJ4	LOC_Os01g12690.1	Os01g0226700	Transcription factor, positive regulator of the BR signaling	Xiao et al., 2017	Xiao, Y.; Liu, D.; Zhang, G.; Tong, H.; Chu, C. Brassinosteroids regulate OFP1, a DLT interacting protein, to modulate plant architecture and grain morphology in rice. Front. Plant Sci. 2017, 8, 1698. [CrossRef] [PubMed]
OsOFP8	LOC_Os01g64430	Q94CV1	LOC_Os01g64430.1	Os01g0864000	Transcription factor, positive regulator of the BR signaling	Yang et al., 2016	Yang C, Shen W, He Y, Tian Z, Li J. OVATE family protein 8 positively mediates brassinosteroid signaling through interacting with the GSK3-like kinase in rice. PLoS Genetics. 2016 Jun 22;12(6):e1006118.
OsBU1	LOC_Os06g12210	Q0DDF6	LOC_Os06g12210.1	Os06g0226500	Transcription factor, positive regulator of the BR signaling	Tanaka et al., 2009	Tanaka, A.; Nakagawa, H.; Tomita, C.; Shimatani, Z.; Ohtake, M.; Nomura, T.; Jiang, C.J.; Dubouzet, J.G.; Kikuchi, S.; Sekimoto, H.; et al. BRASSINOSTEROID UPREGULATED1, encoding a helix-loop-helix protein, is a novel gene involved in brassinosteroid signaling and controls bending of the lamina joint in rice. Plant Physiol. 2009, 151, 669–680
OsWRKY53	LOC_Os05g27730	Q5W6M7	LOC_Os05g27730.1	Os05g0343400	Transcription factor, positive regulator of the BR signaling	Tian et al., 2017	Tian, X.; Li, X.; Zhou, W.; Ren, Y.; Wang, Z.; Liu, Z.; Tang, J.; Tong, H.; Fang, J.; Bu, Q. Transcription factor OsWRKY53 positively regulates brassinosteroid signaling and plant architecture. Plant Physiol. 2017, 175, 1337–1349.
OsMADS47	LOC_Os03g08754	Q5K4R0	LOC_Os03g08754.1	Os03g0186600	Transcription factor, negative regulator of the BR signaling	Duan et al., 2006	Duan K, Li L, Hu P, Xu SP, Xu ZH, Xue HW. A brassinolide‐suppressed rice MADS‐box transcription factor, OsMDP1, has a negative regulatory role in BR signaling. The Plant Journal. 2006 Aug;47(4):519-31.
OsMADS22	LOC_Os02g52340	Q9XJ66	LOC_Os02g52340.1	Os02g0761000	Transcription factor, negative regulator of the BR signaling	Lee et al., 2008	Lee S, Choi SC, An G. Rice SVP‐group MADS‐box proteins, OsMADS22 and OsMADS55, are negative regulators of brassinosteroid responses. The Plant Journal. 2008 Apr;54(1):93-105.
OsMADS55	LOC_Os06g11330	Q69TG5	LOC_Os06g11330.1	Os06g0217300	Transcription factor, negative regulator of the BR signaling	Lee et al., 2008	Lee S, Choi SC, An G. Rice SVP‐group MADS‐box proteins, OsMADS22 and OsMADS55, are negative regulators of brassinosteroid responses. The Plant Journal. 2008 Apr;54(1):93-105.
OsGSR1	LOC_Os06g15620	Q53AN3	LOC_Os06g15620.1	Os06g0266800	GA-stimulated transcript family, repressed by BR, stimulates the BR biosynthesis	Wang et al., 2009	Wang, L.; Wang, Z.; Xu, Y.; Joo, S.H.; Kim, S.K.; Xue, Z.; Xu, Z.; Wang, Z.Y.; Chong, K. OsGSR1 is involved in crosstalk between gibberellins and brassinosteroids in rice. Plant J. 2009, 57, 498–510
OsGAMYBL2	LOC_Os03g38210	Q6F2H1	LOC_Os03g38210.1	Os03g0578900	Transcription factor, represses transcription of the OsBU1 gene	Gao et al., 2018	Gao, J.; Chen, H.; Yang, H.; He, Y.; Tian, Z.; Li, J. A brassinosteroid responsive miRNA-target module regulates gibberellin biosynthesis and plant development. New Phytol. 2018, 220, 488–501.
OsEMF1	LOC_Os01g12890	Q5NB33	LOC_Os01g12890.1	Os01g0229300	Transcription regulator, interacts with the OsARF11 transcription factor to positively co-regulate expression of the OsBRI1 gene	Liu et al., 2018	Liu, X.; Yang, C.Y.; Miao, R.; Zhou, C.L.; Cao, P.H.; Lan, J.; Zhu, X.J.; Mou, C.L.; Huang, Y.S.; Liu, S.J.; et al. DS1/OsEMF1 interacts with OsARF11 to control rice architecture by regulation of brassinosteroid signaling. Rice 2018, 11, 46.
OsGRF4	LOC_Os02g47280	Q6ZIK5	LOC_Os02g47280.1	Os02g0701300	Transcription factor, negative regulator of the BR response	Che et al., 2015	Che, R.; Tong, H.; Shi, B.; Liu, Y.; Fang, S.; Liu, D.; Xiao, Y.; Hu, B.; Liu, L.; Wang, H.; et al. Control of grain size and rice yield by GL2-mediated brassinosteroid responses. Nat. Plants 2015, 2, 15195.
OsILI1	LOC_Os04g54900	Q7X742	LOC_Os04g54900.1	Os04g0641700	Transcription factor, inactivates through heterodimerization the bHLH negative regulator OsIBH1	Zhang et sl., 2009	Zhang LY, Bai MY, Wu J, Zhu JY, Wang H, Zhang Z, Wang W, Sun Y, Zhao J, Sun X, Yang H. Antagonistic HLH/bHLH transcription factors mediate brassinosteroid regulation of cell elongation and plant development in rice and Arabidopsis. The Plant Cell. 2009 Dec;21(12):3767-80.
OsIBH1	LOC_Os04g56500	Q7XR02	LOC_Os04g56500.1	Os04g0660100	Transcription factor, belongs to the bHLH group and acts as a negative regulator of the BR response	Zhang et sl., 2009	Zhang LY, Bai MY, Wu J, Zhu JY, Wang H, Zhang Z, Wang W, Sun Y, Zhao J, Sun X, Yang H. Antagonistic HLH/bHLH transcription factors mediate brassinosteroid regulation of cell elongation and plant development in rice and Arabidopsis. The Plant Cell. 2009 Dec;21(12):3767-80.
OsMAPKK4 (OsMKK4)	LOC_Os02g54600	Q6K4Q0	LOC_Os02g54600.1	Os02g0787300	Mitogen-Activated Protein Kinase Kinase, phosphorylates and activates the OsWRKY53 transcription factor	Duan et al.,2014	Duan, P.; Rao, Y.; Zeng, D.; Yang, Y.; Xu, R.; Zhang, B.; Dong, G.; Qian, Q.; Li, Y. SMALL GRAIN 1, which encodes a mitogen-activated protein kinase kinase 4, influences grain size in rice. Plant J. 2014, 77, 547–557.
OsMAPK6	LOC_Os06g06090	Q84UI5	LOC_Os06g06090.1	Os06g0154500	Mitogen-Activated Protein Kinase Kinase, phosphorylates and activates the OsWRKY53 transcription factor	Liu et al., 2015	Liu, S.; Hua, L.; Dong, S.; Chen, H.; Zhu, X.; Jiang, J.; Zhang, F.; Li, Y.; Fang, X.; Chen, F. OsMAPK6, a mitogen-activated protein kinase, influences rice grain size and biomass production. Plant J. 2015, 84, 672–681.
OsAK3	LOC_Os12g13380	Q08479	LOC_Os12g13380.1	Os12g0236400	Adenylate kinase, interacts with OsPPKL1 phosphatase, positive regulator of the BR response	Zhang et al., 2021	Zhang J, Gao X, Cai G, Wang Y, Li J, Du H, Wang R, Zhang H, Huang J. An Adenylate Kinase OsAK3 Involves Brassinosteroid Signaling and Grain Length in Rice (Oryza sativa L.). Rice. 2021 Dec;14(1):1-6.
OsBHS1	LOC_Os05g06280	B9FMJ3	LOC_Os05g06280.1	Os05g0154700	BHS1 encodes the kinesin-13a protein, it is a negative regulator of the BR signaling	Zhang at al., 2022	Zhang, Y., Dong, G., Chen, F. et al. The kinesin-13 protein BR HYPERSENSITIVE 1 is a negative brassinosteroid signaling component regulating rice growth and development. Theor Appl Genet (2022). https://doi.org/10.1007/s00122-022-04067-2
